# Supplementary material
Source: publisher site journal article supplement (https://www.dovepress.com/article/257492)
Supplement: Supplementary file 1 [file get_supplementary_file.php]

*Supplement Table A1*

Spearman’s Ranking Test of Lymphocyte Subsets and Major Clinicopathological Parameters

| Clinicopathological Parameters | Tumor Grade (G1 vs G2) | Nodal Metastasis (No vs Yes vs Unknown) | Distant Metastasis (No vs Yes) | Tumor Size (≥4cm vs <4cm) | Ki67 (≤2% vs >2%) |
| --- | --- | --- | --- | --- | --- |
| Total T cell  Count | rho = -0.117 | rho = -0.112 | **rho = -0.242** | rho = 0.000 | rho = -0.078 |
| p = 0.329 | p = 0.347 | **p = 0.039*** | p = 1.000 | p = 0.515 |
| CD4+ T cell  Count | rho = -0.085 | rho = -0.035 | **rho = -0.317** | rho = 0.053 | rho = -0.056 |
| p = 0.479 | p = 0.768 | **p = 0.006*** | p = 0.658 | p =0.643 |
| CD8+ T cell  Count | rho = -0.101 | rho = -0.090 | rho = -0.099 | rho = -0.121 | rho = -0.058 |
| p = 0.398 | p = 0.451 | p = 0.404 | p = 0.311 | p = 0.631 |
| NK cell  Count | rho = 0.053 | rho = 0.099 | rho = 0.130 | rho = 0.082 | rho = 0.078 |
| p = 0.659 | p = 0.403 | p = 0.273 | p = 0.493 | p = 0.515 |
| B cell  count | rho = -0.098 | rho = -0.166 | rho = -0.156 | rho = -0.162 | rho = -0.081 |
| p = 0.414 | p = 0.161 | p = 0.187 | p = 0.173 | p = 0.497 |

* p < 0.05. P value derived from Spearman’s ranking tests.

Supplement Table A2

Univariate and Multivariate Analyses for PFS

| Characteristics | Parameters | Univariate Analyses | | |  | Multivariate Analyses | | |
| --- | --- | --- | --- | --- | --- | --- | --- | --- |
|  |  | HR | 95% CI | p value |  | HR | 95% CI | p value |
| Age | < 60 (years) | 1 |  |  |  |  |  |  |
| ≥ 60 (years) | 0.769 | 0.308 to 1.920 | 0.574 |  |  |  |  |
| Sex | Male | 1 |  |  |  |  |  |  |
| Female | 0.707 | 0.315 to 1.587 | 0.401 |  |  |  |  |
| Tumor Location | Head and Neck of Pancreas | 1 |  |  |  |  |  |  |
|  |  |  |  |  |  |  |
| Body and Tail of Pancreas | 1.325 | 0.630 to 2.789 | 0.459 |  |  |  |  |
| Tumor Grade | Low | 1 |  |  |  | 1 |  |  |
| Intermediate | 3.328 | 1.260 to 8.790 | **0.015*** |  | 1.530 | 0.431 to 5.429 | 0.510 |
| Nodal Metastasis | No | 1 |  |  |  | 1 |  |  |
| Yes | 4.160 | 1.602 to 10.800 | **0.003*** |  | 3.191 | 0.971 to 10.482 | 0.056 |
| Unknown | 12.476 | 4.439 to 35.062 | **<0.001*** |  | 6.996 | 0.559 to 87.626 | 0.131 |
| Functional | 1.111 | 0.260 to 4.750 | 0.887 |  |  |  |  |
| Tumor Size | < 4 cm | 1 |  |  |  |  |  |  |
| ≥ 4 cm | 1.525 | 0.691 to 3.370 | 0.296 |  |  |  |  |
| Total T Cells | > 1.07 × 109/L | 1 |  |  |  | 1 |  |  |
| ≤ 1.07 × 109/L | 2.284 | 1.033 to 5.050 | **0.041*** |  | 0.591 | 0.107 to 3.262 | 0.546 |
| CD4+ T Cells | > 0.52 × 109/L | 1 |  |  |  |  |  |  |
| ≤ 0.52 × 109/L | 2.835 | 1.308 to 6.145 | **0.008*** |  | 1.064 | 0.170 to 6.642 | 0.947 |
| CD8+ T Cells | > 0.25 × 109/L | 1 |  |  |  |  |  |  |
| ≤ 0.25 × 109/L | 1.881 | 0.639 to 5.539 | 0.252 |  |  |  |  |
| NK cells | ≤ 0.46× 109/L | 1 |  |  |  | 1 |  |  |
| > 0.46 × 109/L | 3.287 | 1.530 to 7.060 | **0.002*** |  | 3.715 | 1.164 to 11.855 | **0.027*** |
| B cells | > 0.17 × 109/L | 1 |  |  |  | 1 |  |  |
| ≤ 0.17 × 109/L | 2.891 | 1.292 to 6.466 | **0.010*** |  | 6.769 | 2.158 to 21.228 | **0.001*** |

CI confidence interval, HR hazard ratio, * p < 0.05. P value derived from Cox regression: Enter method.
